# Supplementary material for: Estimation Inventories of Persistent Organic Pollutants from Rice Straw Combustion as an Agricultural Waste
Source: MDPI journal article supplement (doi:10.3390/fire6120459), 2023-12-03
Supplement: s1 [file s1]

## Supplementary material

Table S1 Rice crop spray used in Pakistan (© 2021 Syngenta PAKISTAN - Rice, 2021)

| Product Name     | Chemical composition                                                                                                                                                                                                     | Type/Use            | Application<br>(1 acre = 4046.86 sq.m) |
|------------------|--------------------------------------------------------------------------------------------------------------------------------------------------------------------------------------------------------------------------|---------------------|----------------------------------------|
| Ricer            | 500 g/L Cyhalofop Butyl<br>(C <sub>20</sub> H <sub>20</sub> FNO <sub>4</sub> )                                                                                                                                           | Herbicide           | 1 L/acre                               |
| Enrich           | 50 g Penosulam (C <sub>16</sub> H <sub>14</sub> F <sub>5</sub> N <sub>5</sub> O <sub>5</sub> S)<br>400 g/kg Humic Acid                                                                                                   | Crop<br>enhancement | 8 kg/acre                              |
| Apron max        | 70 g/kg Potash<br>25 g/L Fludioxonil (C <sub>12</sub> H <sub>6</sub> F <sub>2</sub> N <sub>2</sub> O <sub>2</sub> )                                                                                                      | Seed care           | 400 ml/100 kg seed                     |
| Rifit            | 37.5 g/L Metalaxyl-M (C <sub>15</sub> H <sub>21</sub> NO <sub>4</sub> )<br>500 g/L Pretilachlor (C <sub>17</sub> H <sub>26</sub> ClNO <sub>2</sub> )                                                                     | Herbicide           | 400-500 ml/acre                        |
| Apiro Forte      | 366.0 g/L Pyrifthalid (C <sub>15</sub> H <sub>14</sub> N <sub>2</sub> O <sub>4</sub> S)                                                                                                                                  | Herbicide           | 160 ml/acre                            |
| ZINC PLUS<br>27% | 270 g/kg<br>Zinc Sulphate (ZnSO <sub>4</sub> )                                                                                                                                                                           | Crop<br>enhancement | 7.5 kg/acre                            |
| Virtako 40 WG    | 200 g/kg Thiamethoxam<br>(C <sub>8</sub> H <sub>10</sub> ClN <sub>5</sub> O <sub>3</sub> S)                                                                                                                              | Insecticide         | 40 g/acre                              |
| Amistar Top      | 200 g/kg Chlorantraniliprole<br>(C <sub>18</sub> H <sub>14</sub> BrCl <sub>2</sub> N <sub>5</sub> O <sub>2</sub> )<br>200 g/L Azoxystrobin<br>(C <sub>22</sub> H <sub>17</sub> N <sub>3</sub> O <sub>5</sub> )           | Fungicide           | 200-300 ml/acre                        |
| Score            | 125 g/L Difenoconazole<br>(C <sub>19</sub> H <sub>17</sub> Cl <sub>2</sub> N <sub>3</sub> O <sub>3</sub> )<br>250 g/L<br>Difenoconazole (C <sub>19</sub> H <sub>17</sub> Cl <sub>2</sub> N <sub>3</sub> O <sub>3</sub> ) | Fungicide           | 125 ml/acre                            |
| Isabion          | 100 g/L<br>Amino Acids                                                                                                                                                                                                   | Crop<br>enhancement | 400-500 ml/100 L water                 |
| Karate           | 25 g/L<br>Lambda Cyhalothrin<br>(C <sub>23</sub> H <sub>19</sub> ClF <sub>3</sub> NO <sub>3</sub> )                                                                                                                      | Insecticide         | 200 ml/g/acre                          |

|                        |                                                                                                           |             |                 |
|------------------------|-----------------------------------------------------------------------------------------------------------|-------------|-----------------|
| Plenum                 | 500 g/kg<br>Pymetrozine (C <sub>10</sub> H <sub>11</sub> N <sub>5</sub> O)                                | Insecticide | 120 g/acre      |
| Actara WG              | 250 g/kg<br>Thiamethoxam (C <sub>8</sub> H <sub>10</sub> ClN <sub>5</sub> O <sub>3</sub> S)               | Insecticide | 24 g/acre       |
| Imidacloprid<br>20% SL | 200 g/L<br>Imidachloprid (C <sub>9</sub> H <sub>10</sub> ClN <sub>5</sub> O <sub>2</sub> )                | Insecticide | 100 ml/acre     |
| Cartap                 | 40 g/kg<br>Hydrochloride (C <sub>7</sub> H <sub>16</sub> ClN <sub>3</sub> O <sub>2</sub> S <sub>2</sub> ) | Insecticide | 09 kg/acre      |
| Copper<br>oxychloride  | Cu <sub>2</sub> (OH) <sub>3</sub> Cl                                                                      | Fungicide   |                 |
| Cuporous oxide         | CuO                                                                                                       | Fungicide   |                 |
| Streptomycin           | C <sub>21</sub> H <sub>39</sub> N <sub>7</sub> O <sub>12</sub>                                            | Fungicide   |                 |
| Bordeux<br>mixture     | Copper Sulphate (CuSO <sub>4</sub> )<br>Quicke Lime (CaO)                                                 | Fungicide   |                 |
| Kumulus                | Sulphur                                                                                                   | Fungicide   | 800 g/kg        |
| Moltovin               | Tribasic copper sulphate<br>(Cu <sub>3</sub> H <sub>2</sub> O <sub>10</sub> S <sub>2</sub> )              | Fungicide   | 250-500 ml/acre |
|                        | Cymoxanil (C <sub>7</sub> H <sub>10</sub> N <sub>4</sub> O <sub>3</sub> )                                 |             |                 |

Table S2 Wheat crop spray used in Pakistan (© 2021 Syngenta PAKISTAN - Wheat, 2021)

| Product name | Composition                                                                                                                                                                                     | Type             | Dosage                   |
|--------------|-------------------------------------------------------------------------------------------------------------------------------------------------------------------------------------------------|------------------|--------------------------|
| Logran       | 750 g/kg Triasulfuron<br>C <sub>14</sub> H <sub>16</sub> ClN <sub>5</sub> O <sub>5</sub> S                                                                                                      | Herbicide        | 16 g/acre                |
| Enrich       | 400 g/kg Humic acid<br>70 g/kg Potash                                                                                                                                                           | Crop enhancement | 8 kg/acre                |
| Vibrance duo | 25 g/L Sedaxane (C <sub>18</sub> H <sub>19</sub> F <sub>2</sub> N <sub>3</sub> O)<br>25 g/L Fludioxonil (C <sub>12</sub> H <sub>6</sub> F <sub>2</sub> N <sub>2</sub> O <sub>2</sub> )          | Seedcare         | 200 ml/100 kg wheat seed |
| Ally max     | 14.3 % Metsulfuron methyl<br>(C <sub>14</sub> H <sub>15</sub> N <sub>5</sub> O <sub>6</sub> S)<br>14.3 % Tribenuron methyl<br>(C <sub>15</sub> H <sub>17</sub> N <sub>5</sub> O <sub>6</sub> S) | Herbicide        | 14 g/acre                |
| Axial        | 50 g/L<br>Pinoxaden (C <sub>23</sub> H <sub>32</sub> N <sub>2</sub> O <sub>4</sub> )                                                                                                            | Herbicide        | 330 ml/acre              |
| Bromoxinil   | 200 g/L Bromoxynil (C <sub>7</sub> H <sub>3</sub> Br <sub>2</sub> NO)                                                                                                                           | Herbicide        | 500 ml/acre              |

|                       |                                                                                                           |                  |                                              |
|-----------------------|-----------------------------------------------------------------------------------------------------------|------------------|----------------------------------------------|
|                       | 200 g/L Mcpa (C <sub>9</sub> H <sub>9</sub> ClO <sub>3</sub> )                                            |                  |                                              |
| Metribuzin            | 70 g/kg<br>Metribuzin (C <sub>8</sub> H <sub>14</sub> N <sub>4</sub> OS)                                  | Herbicide        | 80 g/acre                                    |
| Pendimethalin         | 330 g/L<br>Pendimethalin (C <sub>13</sub> H <sub>19</sub> N <sub>3</sub> O <sub>4</sub> )                 | Herbicide        | 1-1.5 L/acre                                 |
| Sulfosulfuron         | 75 %<br>Sulfosulfuron (C <sub>16</sub> H <sub>18</sub> N <sub>6</sub> O <sub>7</sub> S <sub>2</sub> )     | Herbicide        | 13.5 g/acre adjuent                          |
| Topik                 | 150 g/kg Clodinafop<br>(C <sub>17</sub> H <sub>13</sub> ClFNO <sub>4</sub> )                              | Herbicide        | 120 g/acre                                   |
|                       | 150 g/kg Cloquintocet mexyl<br>(C <sub>18</sub> H <sub>22</sub> ClNO <sub>3</sub> )                       |                  |                                              |
| Naya npk              | 15:15:15<br>Npk                                                                                           | Crop enhancement | 1 kg/acre                                    |
| Naya potash           | 300 g/L<br>Liquid potash                                                                                  | Crop enhancement | 0.3 L/acre                                   |
| Naya zinc plus<br>27% | 270 g/kg<br>Zinc sulphate                                                                                 | Crop enhancement | 7.5 kg/acre                                  |
| Promix                | 8:8:6<br>Npk                                                                                              | Crop enhancement | 500 – 1000 ml/acre in<br>(100 - 120 L water) |
| Tilt                  | 250 g/L<br>Propiconazole (C <sub>15</sub> H <sub>17</sub> Cl <sub>2</sub> N <sub>3</sub> O <sub>2</sub> ) | Fungicide        | 200 ml/acre                                  |

Table S3 Statistics of total area of Rice cultivation, Rice crop production and yield from past 5 years in Pakistan (Pakistan Bureau of Statistics (Government of Pakistan). Pakistan Economy Survey 2019-2020, 2020).

| Year    | Area     | Production | Yield<br>(kg/Hec.) | Consumption of            |
|---------|----------|------------|--------------------|---------------------------|
|         | '000'    | '000'      |                    | fertilizer '000' nutrient |
|         | hectares | tonnes     |                    | tonnes                    |
| 2016-17 | 2724.0   | 6849.3     | 2514               | 302.39                    |
| 2017-18 | 2900.6   | 7449.8     | 2568               | 285.75                    |

|                |        |        |      |        |
|----------------|--------|--------|------|--------|
| <b>2018-19</b> | 2810.0 | 7202.0 | 2563 | 276.83 |
| <b>2019-20</b> | 3034.0 | 7413.7 | 2442 | 272.9  |
| <b>2020-21</b> | 3335.1 | 8419.7 | -    | -      |

Table S4 Details of Metals and POPs (PCDD/fs, PCBs and PAHs) samplings. T<sub>av</sub> Stack: Average temperature in the stack (°C); Biomass feeding: kg of biomass burned per hour (kg/h).

| <b>Sampilg</b> | <b>Time Start</b> | <b>T<sub>av</sub> Stack<br/>°C</b> | <b>Biomass<br/>feeding</b> |
|----------------|-------------------|------------------------------------|----------------------------|
| <b>Punjab</b>  |                   |                                    |                            |
| Dioxin-PAH-PCB | 12:28             | 102.83                             | 6.56 kg/hour               |
| Heavy Metal    | 16:03             | 107.20                             |                            |
| <b>AJK</b>     |                   |                                    |                            |
| Dioxin-PAH-PCB | 14:54             | 111.32                             | 6.64 kg/hour               |
| Heavy Metal    | 16:22             | 118.22                             |                            |
| <b>Sindh</b>   |                   |                                    |                            |
| Dioxin-PAH-PCB | 12:18             | 108.09                             | 7.67 kg/hour               |
| Heavy Metal    | 16:36             | 104.19                             |                            |

© 2021 Syngenta PAKISTAN - Rice, 2021. Rice [WWW Document]. URL <https://www.syngenta.com.pk/rice> (accessed 9.13.21).

© 2021 Syngenta PAKISTAN - Wheat, 2021. Wheat [WWW Document]. URL <https://www.syngenta.com.pk/wheat> (accessed 9.13.21).

Pakistan Bureau of Statistics (Government of Pakistan). Pakistan Economy Survey 2019-2020, 2020. Chapter 2.
